# Supplementary material for: Model-Based Dielectric Constant Estimation of Polymeric Nanocomposite
Source: MDPI journal article supplement (doi:10.3390/polym14061121), 2022-03-11
Supplement: s1 [file s1]

# Supporting Information

## Model-based dielectric constant estimation of polymeric nanocomposite

Jiang Shao<sup>1</sup>, Le Zhou <sup>2</sup>, Yuqi Chen<sup>3</sup>, Xue Liu<sup>4,\*</sup> and Mingbo Ji<sup>5,\*</sup>

<sup>1</sup>Jiangsu University of Science and Technology, Zhenjiang, 212100, P. R. China; Jiang-Shao@hotmail.com

<sup>2</sup>Changzhou Betterial Film Technologies Co., Ltd., Changzhou, 213000, P. R. China; zhoule@betterial.cn

<sup>3</sup>University of Pennsylvania, Philadelphia, 19104, US; sevenchen9819@gmail.com

<sup>4</sup>Henan Key Laboratory of Polyoxometalate Chemistry, College of Chemistry and Chemical Engineering, Henan University, Kaifeng, Henan 475004, P. R. China; xliu@ipe.ac.cn

<sup>5</sup>Harbin Engineering University, 264000 Yantai, China; minjikt@outlook.com

\* Correspondence: xliu@ipe.ac.cn; Tel.: +86 15101544706; minjikt@outlook.com; Tel.: +86 13041090299

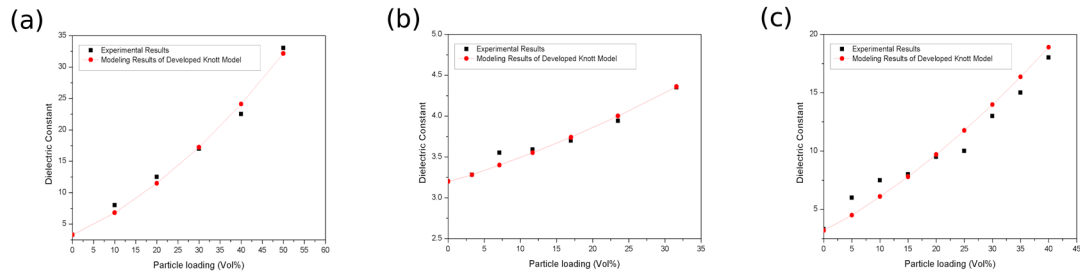

**Figure S1** The dielectric constant of the experimental data and modeling results based on the developed Knott model of three nanocomposites: (a) PI-BTiO<sub>3</sub> composite;<sup>1</sup> (b) ER-Al<sub>2</sub>O<sub>3</sub> composite;<sup>2</sup> (c) PI-BTiO<sub>3</sub> composite<sup>3</sup>

## Reference

1. Fan B H, Zha J W, Wang D R, et al. Experimental study and theoretical prediction of dielectric permittivity in BaTiO<sub>3</sub>/polyimide nanocomposite films[J]. Applied Physics Letters, 2012, 100(9): 092903.
2. Kochetov R, Andritsch T, Morshuis P H F, et al. Thermal and electrical behaviour of epoxy-based microcomposites filled with Al<sub>2</sub>O<sub>3</sub> and SiO<sub>2</sub> particles[C]//2010 IEEE International Symposium on Electrical Insulation. IEEE, 2010: 1-5.
3. Dang Z M, Lin Y Q, Xu H P, et al. Fabrication and dielectric characterization of advanced BaTiO<sub>3</sub>/polyimide nanocomposite films with high thermal stability[J]. Advanced Functional Materials, 2008, 18(10): 1509-1517.
